# Supplementary material
Source: MDPI journal article supplement (https://www.mdpi.com/2075-163X/9/11/649)
Supplement: s1 [file s1]

## Supplementary Materials

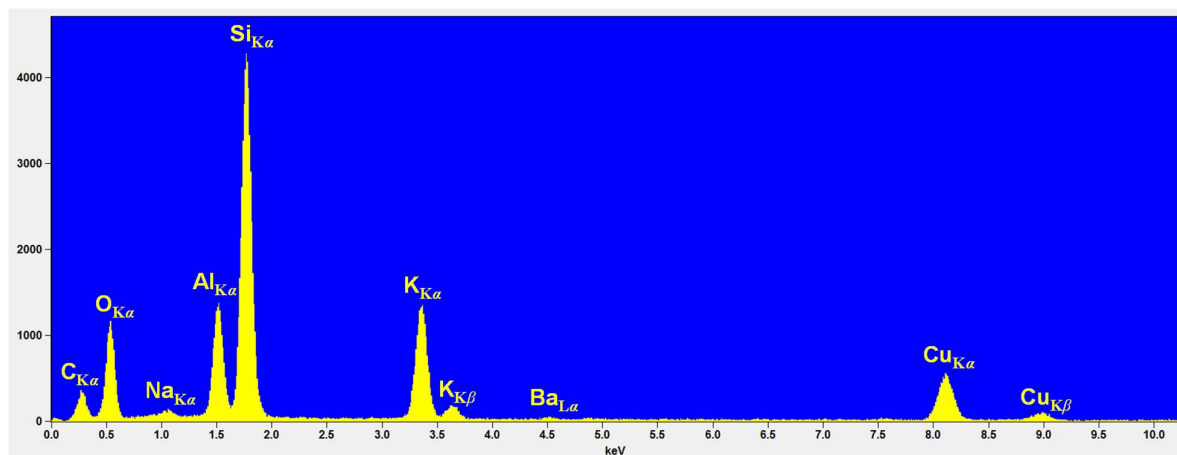

**Figure S1.** X-ray EDS spectrum from the adularia showing Si, Al, K, Na, and trace amount of Ba in the crystal. Cu peaks are from TEM Cu grid that holds the specimen.

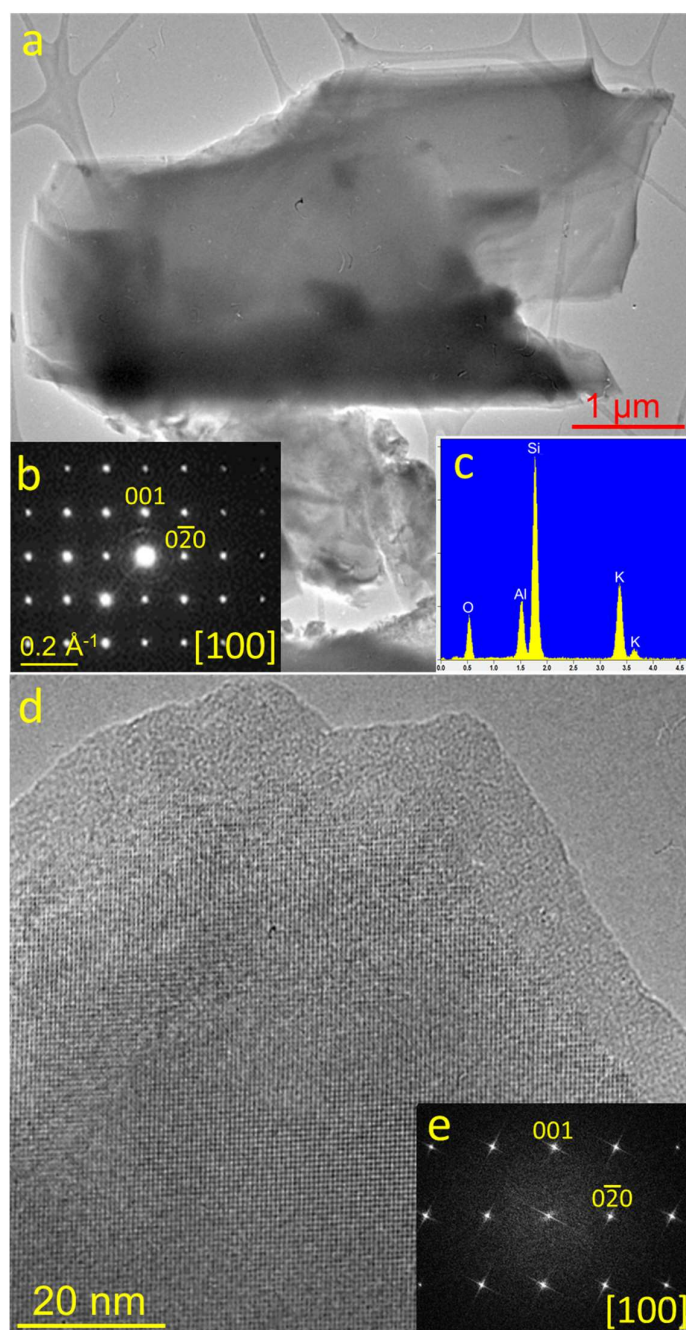

**Figure S2.** The bright-field TEM image, SAED pattern, TEM-EDS, High-resolution TEM image with its FFT pattern of adularia at [100] zone-axis, showing no diffuse diffractions along  $b^*$ - direction. The adularia is a weathering product in North American Sub-Cambrian Paleosols ([1]).

**Table S1.** Experimental and crystallographic information of the adularia sample (100K).

|                                                           | Host                              | Nano-phase                                         | One phase                                                           |
|-----------------------------------------------------------|-----------------------------------|----------------------------------------------------|---------------------------------------------------------------------|
| Crystal data                                              |                                   |                                                    |                                                                     |
| Formula                                                   | KAlSi <sub>3</sub> O <sub>8</sub> | KNaAl <sub>2</sub> Si <sub>6</sub> O <sub>16</sub> | K <sub>0.9</sub> Na <sub>0.1</sub> AlSi <sub>3</sub> O <sub>8</sub> |
| <i>a</i> , <i>b</i> , <i>c</i> (Å)                        | 8.5291(1)                         | 8.5291(1)                                          |                                                                     |
|                                                           | 12.9795(2)                        | 12.9795(2)                                         |                                                                     |
|                                                           | 7.2032(1)                         | 7.2032(1)                                          |                                                                     |
| $\alpha$ , $\beta$ , $\gamma$ (°)                         | 90                                | 90                                                 |                                                                     |
|                                                           | 116.0521(7)                       | 116.0521(7)                                        |                                                                     |
|                                                           | 90                                | 90                                                 |                                                                     |
| V (Å <sup>3</sup> )                                       | 716.397(18)                       | 716.397(18)                                        |                                                                     |
| Space group                                               | <i>C2/m</i>                       | <i>Pa</i>                                          | <i>C2/m</i>                                                         |
| Data collection                                           |                                   |                                                    |                                                                     |
| Diffraction Source                                        | Mo K $\alpha$                     | X-ray                                              | Mo K $\alpha$ X-ray                                                 |
| Total reflections                                         | 16915                             |                                                    | 8567                                                                |
| Independent reflections                                   | 4359                              |                                                    | 1139                                                                |
| Observed [ <i>I</i> > 3 $\sigma$ ( <i>I</i> )]            | 2199                              |                                                    | 1109                                                                |
| <i>R</i> <sub>int</sub>                                   | 4.22                              |                                                    | 4.7                                                                 |
| $\theta$ values (°)                                       | 1.57                              |                                                    | 3.09                                                                |
|                                                           | 30.53                             |                                                    | 30.53                                                               |
| Range of <i>h</i> , <i>k</i> , <i>l</i>                   | <i>h</i> = -12→12                 |                                                    | <i>h</i> = -12→12                                                   |
|                                                           | <i>k</i> = -18→18                 |                                                    | <i>k</i> = -18→18                                                   |
|                                                           | <i>l</i> = -10→10                 |                                                    | <i>l</i> = -10→10                                                   |
| Refinement                                                |                                   |                                                    |                                                                     |
| Twin Percentage *                                         | 80%                               | 11.4%, 8.6%                                        | 100%                                                                |
| wRobs (%)                                                 | 3.56                              |                                                    | 5.09                                                                |
| wRall (%)                                                 | 3.79                              |                                                    | 5.12                                                                |
| GOF (all)                                                 | 1.2                               |                                                    | 2.33                                                                |
| GOF (obs)                                                 | 1.64                              |                                                    | 2.35                                                                |
| No. of parameters                                         | 298                               |                                                    | 63                                                                  |
| No. of constraints                                        | 65                                |                                                    | 25                                                                  |
| $\Delta Q_{\max}$ , $\Delta Q_{\min}$ (eÅ <sup>-3</sup> ) | 0.33, -0.36                       |                                                    | 0.44, -0.33                                                         |

\* The crystal contains 80% of end-member orthoclase and 20% of the nano-precipitates with *Pa* symmetry in twinning relationship (11.4% and 8.6% for each orientation).

**Table S2.** Fractional coordinates for the adularia average structure with *C2/m* symmetry (100K).

| Label          | Atom | Occ    | x           | y           | z           | U <sub>eq</sub> |
|----------------|------|--------|-------------|-------------|-------------|-----------------|
| M              | K    | 0.9    | 0.28189(5)  | 0           | 0.13643(7)  | 0.01451(18)     |
|                | Na   | 0.1    | 0.28189(5)  | 0           | 0.13643(7)  | 0.01451(18)     |
| T <sub>1</sub> | Si   | 0.5895 | 0.00914(5)  | 0.18368(3)  | 0.22418(5)  | 0.00925(17)     |
|                | Al   | 0.4105 | 0.00914(5)  | 0.18368(3)  | 0.22418(5)  | 0.00925(17)     |
| T <sub>2</sub> | Si   | 0.9105 | 0.29366(5)  | 0.11748(3)  | 0.65551(5)  | 0.00881(17)     |
|                | Al   | 0.0895 | 0.29366(5)  | 0.11748(3)  | 0.65551(5)  | 0.00881(17)     |
| Oa1            | O    | 1      | 0           | 0.14426(10) | 0           | 0.0158(5)       |
| Oa2            | O    | 1      | 0.6319(2)   | 0           | 0.2857(2)   | 0.0159(5)       |
| Ob             | O    | 1      | 0.17431(15) | 0.14360(8)  | 0.77266(17) | 0.0177(4)       |
| Oc             | O    | 1      | 0.46745(14) | 0.18946(7)  | 0.74132(16) | 0.0143(3)       |
| Od             | O    | 1      | 0.18304(14) | 0.12537(7)  | 0.40745(15) | 0.0131(3)       |

Note: See Supplementary cif file for the electronic file.

**Table S3.** Fractional coordinates for the nano-phase alkali feldspar with *Pa* symmetry (100K).

| Label | Atom | Occ    | x          | y          | z          | U <sub>eq</sub> |
|-------|------|--------|------------|------------|------------|-----------------|
| Mo    | Na   | 1      | 0.2789(13) | 0.2494(4)  | 0.1413(13) | 0.034(4)        |
| M2    | K    | 1      | 0.2124(10) | 0.7498(2)  | 0.8648(10) | 0.059(3)        |
| T1oo  | Si   | 0.5763 | 0.5095(10) | 0.9335(5)  | 0.2272(9)  | 0.048(3)        |
|       | Al   | 0.4237 |            |            |            |                 |
| T1io  | Si   | 0.4032 | 0.9959(13) | 0.4364(7)  | 0.7834(10) | 0.057(4)        |
|       | Al   | 0.5968 |            |            |            |                 |
| T1o2  | Si   | 0.5763 | 0.4924(10) | 0.9364(5)  | 0.7830(8)  | 0.045(3)        |
|       | Al   | 0.4237 |            |            |            |                 |
| T1i2  | Si   | 0.5763 | 0.0108(11) | 0.4336(5)  | 0.2280(10) | 0.055(3)        |
|       | Al   | 0.4237 |            |            |            |                 |
| T2oo  | Si   | 0.9237 | 0.8002(9)  | 0.8659(4)  | 0.6623(8)  | 0.047(3)        |
|       | Al   | 0.0763 |            |            |            |                 |
| T2io  | Si   | 0.9237 | 0.7063(10) | 0.3675(5)  | 0.3473(8)  | 0.057(3)        |
|       | Al   | 0.0763 |            |            |            |                 |
| T2o2  | Si   | 0.9237 | 0.2075(8)  | 0.8678(4)  | 0.3479(7)  | 0.044(2)        |
|       | Al   | 0.0763 |            |            |            |                 |
| T2i2  | Si   | 0.9237 | 0.3002(11) | 0.3648(5)  | 0.6624(9)  | 0.057(3)        |
|       | Al   | 0.0763 |            |            |            |                 |
| Oa1_1 | O    | 1      | 0.505(3)   | 0.8942(9)  | 0.001(2)   | 0.055(7)        |
| Oa1_2 | O    | 1      | 0.004(3)   | 0.3963(10) | 0.999(3)   | 0.059(8)        |
| Oa2o  | O    | 1      | 0.632(3)   | 0.2495(7)  | 0.295(3)   | 0.041(7)        |
| Oa22  | O    | 1      | 0.904(6)   | 0.7497(7)  | 0.735(4)   | 0.120(18)       |
| Oboo  | O    | 1      | 0.664(2)   | 0.8978(11) | 0.772(2)   | 0.054(7)        |
| Obio  | O    | 1      | 0.825(3)   | 0.4010(10) | 0.235(2)   | 0.055(8)        |
| Obo2  | O    | 1      | 0.325(2)   | 0.8998(11) | 0.235(2)   | 0.051(6)        |
| Obi2  | O    | 1      | 0.164(2)   | 0.3981(13) | 0.771(2)   | 0.057(8)        |
| Ocoo  | O    | 1      | 0.950(2)   | 0.9394(13) | 0.7454(17) | 0.048(6)        |
| Ocio  | O    | 1      | 0.509(2)   | 0.4371(11) | 0.259(2)   | 0.050(8)        |
| Oco2  | O    | 1      | 0.009(2)   | 0.9376(11) | 0.258(2)   | 0.052(8)        |
| Oci2  | O    | 1      | 0.449(2)   | 0.4382(14) | 0.746(2)   | 0.053(7)        |
| Odoo  | O    | 1      | 0.675(2)   | 0.8726(9)  | 0.4005(16) | 0.039(5)        |
| Odio  | O    | 1      | 0.811(2)   | 0.3856(10) | 0.573(3)   | 0.062(9)        |
| Odo2  | O    | 1      | 0.310(2)   | 0.8837(7)  | 0.571(3)   | 0.061(10)       |
| Odi2  | O    | 1      | 0.174(2)   | 0.3709(11) | 0.397(2)   | 0.048(6)        |

Note: See Supplementary cif file for the electronic file.

**Table S4.** Bond distances for the T sites.

|                                             | O1     | O2     | O3     | O4     | average  |
|---------------------------------------------|--------|--------|--------|--------|----------|
| T1oo                                        | 1.6104 | 1.6622 | 1.6940 | 1.6955 | 1.6655   |
| T1io                                        | 1.5815 | 1.6215 | 1.6496 | 1.7701 | 1.6557   |
| T1o2                                        | 1.6211 | 1.6578 | 1.6880 | 1.6916 | 1.6646   |
| T1i2                                        | 1.5567 | 1.6104 | 1.6695 | 1.7662 | 1.6507   |
| T2oo                                        | 1.4865 | 1.6909 | 1.7165 | 1.7355 | 1.6574   |
| T2io                                        | 1.4681 | 1.5982 | 1.6317 | 1.7730 | 1.6178   |
| T2o2                                        | 1.4872 | 1.7104 | 1.7133 | 1.7180 | 1.6572   |
| T2i2                                        | 1.4901 | 1.6086 | 1.6369 | 1.7642 | 1.6250   |
| Bond distance in host <i>C2/m</i> structure |        |        |        |        |          |
| T <sub>1</sub>                              | 1.6579 | 1.6629 | 1.6636 | 1.6722 | 1.66415  |
| T <sub>2</sub>                              | 1.6163 | 1.6184 | 1.6275 | 1.6339 | 1.624025 |

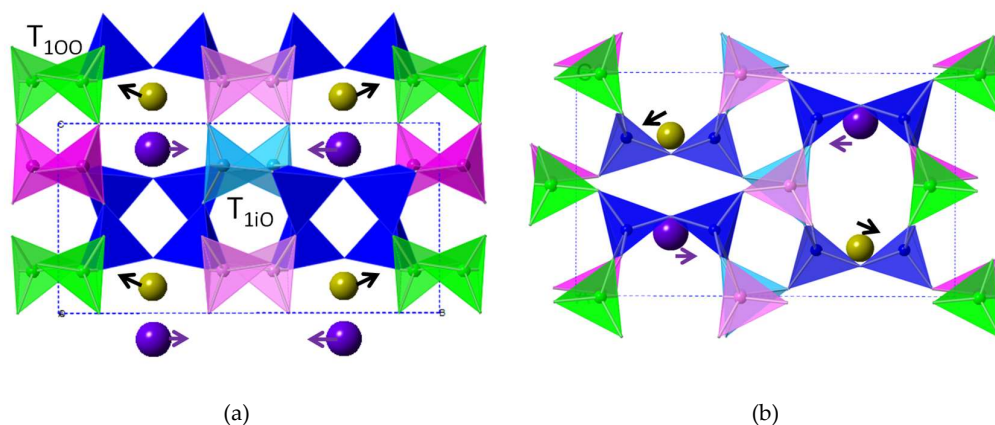

**Figure S3.** Structural model of the nano-phase with  $Pa$  symmetry along  $a$ -axis (a) and  $c$ -axis (b), respectively. Arrows indicate shift directions of Na and K atoms with respect to the special position (i.e., K in  $C2/m$  structure). All  $T_2$  sites are in blue color.

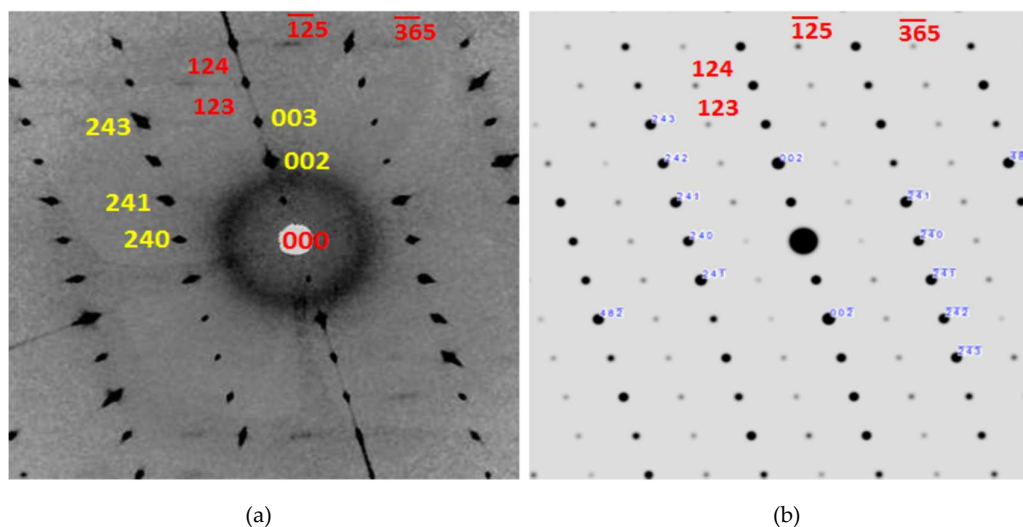

**Figure S4.** Fig. [2-10] zone-axis precession image (a) and calculated SAED pattern (b) showing consistent intensities for the diffraction spots violating  $C$ -centering.

Note: Procedures for structure refinement

JANA2006 software is capable of refining multiple structures that are sharing the main reflections in the diffraction data ([2]). A .cif file was exported from the  $C2/m$  refinement with only K assigned to the M site. The symmetry of the .cif file was modified to  $Pa$  with VESTA software, quadrupling the number of tetrahedral sites and oxygen atoms while leaving the structure exactly the same as in  $C2/m$  structure. One of the M site was changed to Na atom. A new phase with stoichiometry of  $KNa(Si_6Al_2)O_{16}$  was added to the refinement in JANA2006 program by importing the modified .cif file. The proportion of the new phase is initially fixed to 5%. Only atom positions of the new phase were refined, with the occupancies of the tetrahedral sites kept the same as the  $C2/m$  phase. After the refinement converged, the proportion of the second phase was increased to 10%. The same process was repeated several times until the proportion of the second phase reaches 20%. Because the reflections from the second phase were too weak and diffuse, it took several attempts to make the refinement reach a stable final structure. Some parameters had to be fixed during the refinement that were relaxed at a later step. Detail parameters and conditions are listed in Table S1.

**Reference:**

1. Medaris Jr, L.G.; Driese, S.G.; Stinchcomb, G.E.; Fournelle, J.H.; Lee, S.; Xu, H.; DiPietro, L.; Gopon, P.; Stewart, E.K. Anatomy of a Sub-Cambrian Paleosol in Wisconsin: Mass fluxes of chemical weathering and climatic conditions in North America during Formation of the Cambrian Great Unconformity. *J. Geol.* **2018**, *126*, 261–283.
1. Topa, D.; Petříček, V.; Dušek, M.; Makovicky, E.; Balić-Zunić, T. Simultaneous refinement of two components of an exsolution intergrowth: Crystal structures of the lindströmite–krupkaite pair. *Can. Mineral.* **2008**, *46*, 525–539.
